# Supplementary material
Source: HighWire-hosted journal article supplement (https://bmjopen.bmj.com/content/6/9/e013276)
Supplement: inline-supplementary-material-1 [file inline-supplementary-material-1.pdf]

Table A1. Differential impact of the number of chronic conditions by birth cohort: Results from logistic cross-classified multilevel models <sup>a</sup>. Canadian National Population Health Survey, 1994-2011

|                                                                    | Women              | Men                |
|--------------------------------------------------------------------|--------------------|--------------------|
|                                                                    | Estimate (S.E.)    | Estimate (S.E.)    |
| Intercept                                                          | -0.945 (0.177) *** | -1.722 (0.184) *** |
| Linear age <sup>b</sup>                                            | -0.033 (0.004) *** | -0.006 (0.004) **  |
| Quadratic age                                                      | 0.001 (0.0001) *** | 0.001 (0.0001) *** |
| Birth cohort (Ref: Pre-World War)                                  |                    |                    |
| Generation X                                                       | -0.407 (0.192) *** | -0.156 (0.200)     |
| Younger Baby Boomer                                                | -0.319 (0.167) **  | -0.171 (0.174)     |
| Older Baby Boomer                                                  | -0.248 (0.148)     | -0.141 (0.153)     |
| World War II                                                       | -0.066 (0.137)     | 0.009 (0.141)      |
| <b><i>Predisposing, Enabling, and Behavior-related Factors</i></b> |                    |                    |
| Education (Ref: 16+ years)                                         |                    |                    |
| <12 years                                                          | -0.044 (0.060)     | 0.008 (0.062)      |
| 12-15 years                                                        | 0.013 (0.049)      | 0.014 (0.052)      |
| Income quartiles (Ref: Top (Q4) )                                  |                    |                    |
| Bottom (Q1)                                                        | 0.041 (0.049)      | 0.156 (0.052)      |
| Q2                                                                 | -0.018 (0.045)     | 0.045 (0.046)      |
| Q3                                                                 | 0.032 (0.041)      | 0.042 (0.041)      |
| Missing                                                            | -0.086 (0.082)     | -0.179 (0.106)     |
| Have regular source of care                                        | 1.142 (0.049) ***  | 1.012 (0.043) ***  |
| Smokers (Ref: never)                                               |                    |                    |
| Current                                                            | -0.049 (0.044)     | -0.062 (0.048)     |
| Former                                                             | 0.023 (0.038)      | 0.080 (0.043)      |
| BMI (Ref: Normal) <sup>c</sup>                                     |                    |                    |
| Severe obese                                                       | 0.457 (0.069) ***  | 0.530 (0.088) ***  |
| Moderate obese                                                     | 0.402 (0.049) ***  | 0.264 (0.051) ***  |
| Overweight                                                         | 0.197 (0.034) ***  | 0.110 (0.037) ***  |
| Underweight                                                        | 0.081 (0.088)      | 0.248 (0.198)      |
| Physically inactive                                                | 0.101 (0.027) ***  | 0.047 (0.029) ***  |
| Sedentary lifestyle                                                | 0.071 (0.033) **   | 0.124 (0.036) ***  |
| <b><i>Need for healthcare</i></b>                                  |                    |                    |
| Chronic conditions (Ref: none)                                     |                    |                    |
| 2+                                                                 | 1.943 (0.198) ***  | 2.040 (0.220) ***  |
| 1                                                                  | 0.885 (0.197) ***  | 1.082 (0.205) ***  |
| <b>Age by Chronic conditions (Ref: None)</b>                       |                    |                    |
| 2+                                                                 | -0.012 (0.006) *** | -0.016 (0.006) *** |
| 1                                                                  | -0.005 (0.006) *** | -0.005 (0.006) *** |
| <b>Birth Cohort by Chronic conditions (Ref: None)</b>              |                    |                    |
| 2+ conditions:                                                     |                    |                    |
| Generation X                                                       | -0.999 (0.251) *** | -1.098 (0.278) *** |
| Younger Baby Boomer                                                | -0.707 (0.203) *** | -0.639 (0.222) *** |
| Older Baby Boomer                                                  | -0.369 (0.168) **  | -0.216 (0.182)     |
| World War II                                                       | -0.257 (0.151)     | -0.045 (0.165)     |
| One condition:                                                     |                    |                    |
| Generation X                                                       | -0.431 (0.249)     | -0.565 (0.257)     |
| Younger Baby Boomer                                                | -0.312 (0.204)     | -0.368 (0.211)     |
| Older Baby Boomer                                                  | -0.116 (0.170)     | -0.154 (0.176)     |
| World War II                                                       | 0.044 (0.157)      | -0.254 (0.162)     |

BMI, Body Mass Index; OR, Odd Ratio; 95% CI, 95% Confidence Interval. \*\*\*  $p < 0.0001$ , \*\*  $p < 0.01$ , \*  $p < 0.05$ , <sup>†</sup>  $p < 0.1$ . <sup>a</sup> Models include period (survey year) as a random effect. <sup>b</sup> Age is centered at the mean of the distribution in 1994/95 (39 years). <sup>c</sup> Severe obese ( $\geq 35.0$ ), Moderate Obese (30.0-34.9), Overweight (25.0-29.9), Underweight ( $< 18.5$ ), Normal (18.5-24.9).
